# 1 The cost of heat waves and droughts for global crop production

2  
3 Zia Mehrabi<sup>1</sup> and Navin Ramankutty<sup>1</sup>  
4

## 5 6 **Abstract** 7

8 Heat waves and droughts are a key risk to global crop production and quantifying the  
9 extent of this risk is essential for insurance assessment and disaster risk reduction. Here  
10 we estimate the cumulative production losses of six major commodity groups under both  
11 extreme heat and drought events, across 131 countries, over the time period of 1961-  
12 2014. Our results show substantial variation in national disaster risks that have hitherto  
13 gone unrecognised in regional and global average estimates. The most severe losses are  
14 represented by cereal losses in Angola (4.1%), Botswana (5.7%), USA (4.4%) and  
15 Australia (4.4%), oilcrop losses in Paraguay (5.5%), pulse losses in Angola (4.7%) and  
16 Nigeria (4.8%), and root and tuber losses in Thailand (3.2%). In monetary terms we  
17 estimate the global production loss over this period to be \$237 billion US Dollars (2004-  
18 2006 baseline). The nations that incurred the largest financial hits were the USA (\$116  
19 billion), the former Soviet Union (\$37 billion), India (\$28 billion), China (\$10.7 billion)  
20 and Australia (\$8.5 billion USD). Our analysis closes an important gap in our  
21 understanding of the impacts of extreme weather events on global crop production and  
22 provides the basis for country relevant disaster risk reduction.  
23  
24  
25  
26  
27  
28  
29  
30  
31  
32  
33  
34  
35  
36  
37  
38

---

<sup>1</sup>The UBC School of Public Policy and Global Affairs & Institute for Resources,  
Environment and Sustainability, University of British Columbia.

Correspondence: [zia.mehrabi@ubc.ca](mailto:zia.mehrabi@ubc.ca)

39 **Main text**

40

41 There is now credible evidence that human driven climate change is leading to an  
42 increase in the severity and frequency of extreme weather events<sup>1</sup>. However, the  
43 agricultural risk associated with these extreme events is not only a function of their  
44 frequency: it also depends on whether they occur in key production locations, and how  
45 vulnerable production systems are to their onset<sup>2,3</sup>. Despite calls from within and outside  
46 the scientific community to determine agricultural risk under extreme weather  
47 disasters<sup>2,4,5</sup>, and the identification of heat waves and droughts as key components of this  
48 risk<sup>3</sup>, we still know surprisingly little about the impact of disaster events on crop  
49 production at the global level. There are at least three agenda setting knowledge gaps  
50 that need to be filled. First, previous work on the impact of these events has averaged  
51 impacts at a regional level<sup>3</sup>. We need to estimate risk on the country level to align  
52 scientific efforts with international disaster risk response profiling initiatives (e.g.  
53 INFORM<sup>6</sup>). Second, average per-impact loss estimates<sup>3</sup>, are important for determining  
54 stocking requirements for isolated events, but do not give the full picture of risk, which is  
55 intrinsically dependent on disaster return times<sup>2</sup>. Third, whilst cereals have been the  
56 predominant focus of global analyses of climate impacts<sup>3,7-9</sup>, differences in production  
57 geographies<sup>10</sup> as well as renewed focus on nutrition<sup>11,12</sup> suggest a need to assess climate  
58 disaster risk profiles across different commodity groups.

59

60 Here we attempt to fill these three knowledge gaps by estimating the cumulative impact  
61 of nationally reported extreme heat and drought disasters occurring in 131 countries on  
62 the productivity of six major commodity groups (cereals, oilcrops, pulses, roots and  
63 tubers, vegetables and fruits), over the period of 1961-2014. Following previous work<sup>3</sup>,  
64 we utilize disaster occurrence data from the EM-DAT CRED International Disasters  
65 Database<sup>13</sup>, and crop production and value time series data from the United Nations Food  
66 and Agricultural Organisation<sup>14</sup>. We estimate national production deviations during heat  
67 and drought disaster years for each country and commodity compared to a counterfactual  
68 without disasters. We then use historical simulations to identify the null distribution of  
69 production deviations in each country in non-disaster years. This methodology provides  
70 new insights into the countries that show out of the ordinary crop production deviations  
71 in years in which extreme weather disasters were reported. In addition to calculating the  
72 impacts associated with heat and drought disasters, we also identify the global cost of  
73 these losses in monetary terms and the profile of monetary losses across all nations for  
74 which notable production deviations occurred.

75

76 Globally, we estimate that 1.4% of cereal production, 0.5% of oilcrops, 0.6% of pulses,  
77 0.2% of fruits, and 0.09% of vegetable were lost due to heat and drought disasters over  
78 1961-2014. Our improved estimate of global cereal production loss is almost half the  
79 previous estimate of the impact of heat and drought events<sup>3</sup> which pooled counterfactuals  
80 across countries globally. This is the first time to our knowledge that the global crop  
81 production losses to heat and drought events for non-cereal commodity groups has been  
82 calculated.

83

84

85 Our results show substantial variation in national responses to heat and drought (Figure  
86 1). The largest drag from heat and drought for cereals were observed in Botswana (5.7%),  
87 followed closely by the USA (4.4%), Australia (4.4%), and Angola (4.1%). There are a  
88 few things to note about these losses. First, these national losses deviate markedly from  
89 the global loss estimate. Second, there are some countries where the production losses  
90 under heat and drought events are close to the null distribution for these types of disasters  
91 (e.g. Botswana), and others where associated losses fall far outside the natural variation  
92 in production (e.g. Angola and USA; Figure 1A). This illustrates that the perception of  
93 heat and drought disaster risk is likely to greatly depend on the other factors that drive  
94 inter-annual production variation within each country. Third, our analyses show equal  
95 levels of long-term risk in percentage terms in both developed and less developed  
96 countries. Thus on a percentage basis, disaster risks might not be greater in  
97 technologically advanced farming systems as had previously been suggested<sup>3,15</sup>.

98  
99 Our analysis also shows substantial variation in the influence of heat and drought across  
100 different commodity types. The largest non-cereal losses occurred in Paraguay for oilcrop  
101 production (5.5%), Angola and Nigeria for pulse production (4.7% and 4.8%  
102 respectively), and Thailand for roots and tubers (3.2%). This commodity comparison  
103 provides two additional insights. First, there are differences between commodity  
104 responses within countries during heat and drought events. For example, over the study  
105 period the USA saw significant losses in cereal (see above) and oilcrops (1.1%), but  
106 significant gains in pulse production (1.6%). The presence of positive deviations, or lack  
107 of significant impacts in certain commodities where others fail, is suggestive that  
108 commodity diversity might offer some alleviation of risk to extreme events due to  
109 portfolio effects – a benefit of biodiversity well recognized in the ecological literature  
110 (see Ref 16). Secondly, some commodities seem more susceptible than others – the least  
111 severe losses occur in vegetables, fruits, and roots and tubers, and the most severe in  
112 cereals, oilcrops and pulses. These differences suggest that an assessment of sustainable  
113 diets<sup>11,12</sup> might also benefit from identifying the ‘climate riskiness of the plate’ in  
114 addition to other environmental and social considerations.

115  
116 In monetary terms we estimate the net effect of heat and drought events across all  
117 commodities and countries over the study period to be ~\$237 billion USD (2004-2006  
118 baseline). These losses were not evenly distributed across countries – the largest financial  
119 losses were incurred by USA (\$116 billion), Soviet Union (\$37 billion), India (\$28  
120 billion), China (\$11 billion) and Australia (\$8.5 billion) (Figure 2) (Although our  
121 estimates for China are more conservative than for other countries, see Supplementary  
122 Information). Losses were also not evenly distributed across commodity types, with the  
123 vast majority being due to cereals (\$190 billion), and the remaining allocated to pulses  
124 (\$3.4 billion), oilcrops (\$19 billion), roots and tubers (\$9.3 billion), fruits (\$12 billion)  
125 and vegetables (\$2.1 billion). These monetary impacts show substantial bias for losses  
126 toward countries holding the world’s major breadbaskets, and towards crops that make up  
127 most of human calorific intake. These figures highlight the potential economic  
128 opportunity from reducing vulnerability and exposure to extreme heat and drought events  
129 in arable agriculture.

130

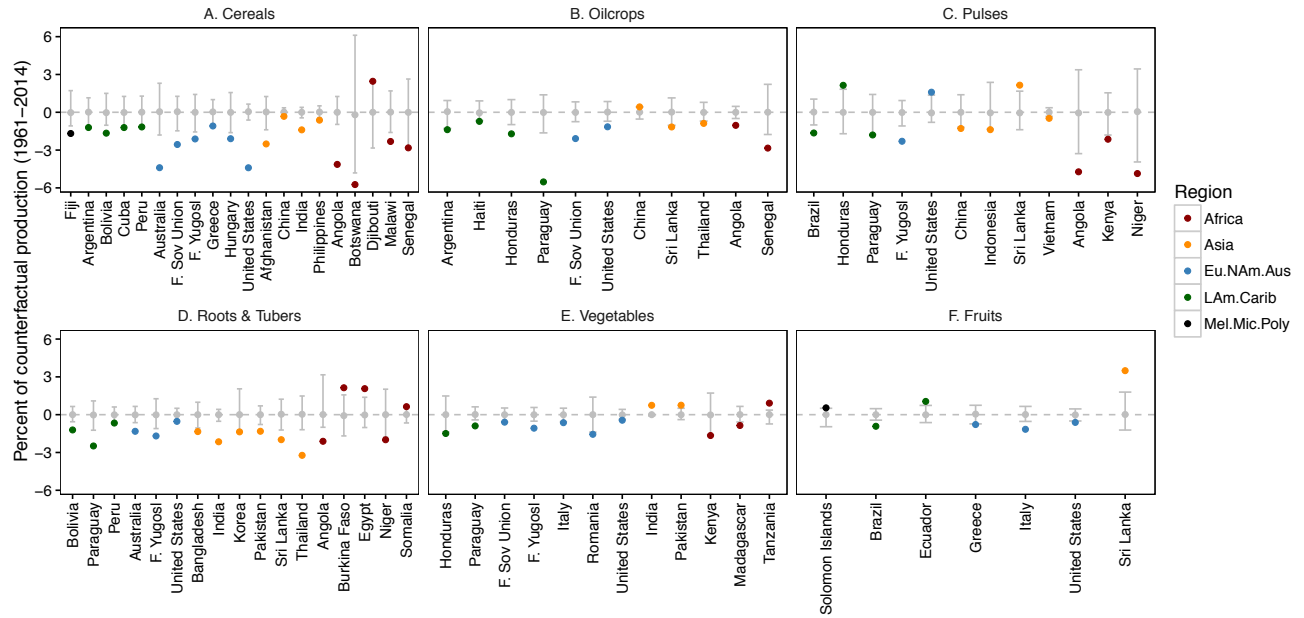

131  
 132 **Fig 1.** Effect of heat and drought disasters on global crop production. All the cases where  
 133 a significant production loss or gain was estimated are shown. The y-axis indicates the  
 134 percent of production within a country that was lost or gained during heat and drought  
 135 events over 1961-2014. Gray points and whiskers show the median and range of the null  
 136 distribution for losses or gains in years when heat and drought events did not occur.  
 137  
 138  
 139  
 140

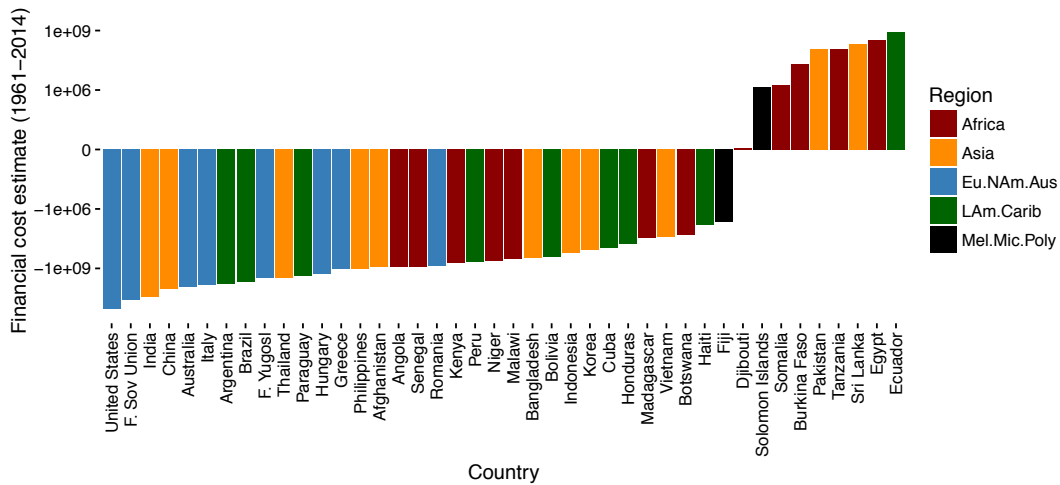

141 **Fig 2.** Estimated economic cost of heat and drought disasters on global crop production  
 142 during 1961-2014. Losses and gains in production from figure 1 were converted into  
 143 dollar values and summed for each country. A y-axis value of  $-1e+09$  is equal to a loss of  
 144 1 billion USD (2004-2006 baseline). Note the logarithmic scale on the y-axis.

145

146

147

148 We have four key messages from this analysis. First, we find large variation in the effects  
149 of heat and drought disasters on crop production at the national level, which has to date  
150 gone unrecognized in global analyses. Second, we find evidence for significant drag on  
151 crop production in countries in Africa and Asia that on a percent basis equal those in the  
152 USA or Europe. This contradicts previous analysis that estimated regional averages and  
153 suggests that both developed countries and less developed countries can be equally  
154 susceptible on the national level to droughts and heat waves. Third, we observed  
155 differences between commodities in the historical impacts of heat and drought events.  
156 These differences between nations and commodities suggest that our risk profiles to  
157 extreme events will depend on what we choose to consume and in which country we  
158 choose to grow it. How future consumption trends influence the climate risk comprises an  
159 important avenue of future research. Finally, we found that the financial losses from  
160 extreme heat and drought events are not trivial and are not evenly allocated across  
161 countries. We show significant economic opportunity from avoiding similar losses to heat  
162 and drought events in future – particularly for large agricultural producers such as the  
163 USA.

164

165 In sum, our analysis provides the first global picture of cumulative losses associated with  
166 drought and heat events across different commodity types at the country level, and the  
167 first monetary evaluation of these losses. We hope that this work will help better integrate  
168 scientific assessments of risk into international disaster risk response profiling initiatives,  
169 will aid proactive action to prevent losses in the future, and garner support for designing  
170 more resilient global cropping systems.

171

172

## 173 **References**

174

- 175 1. Diffenbaugh, N. S. *et al.* Quantifying the influence of global warming on  
176 unprecedented extreme climate events. *Proc. Natl. Acad. Sci.* **114**, 201618082  
177 (2017).
- 178 2. Intergovernmental Panel on Climate Change, *Managing the Risks of Extreme*  
179 *Events and Disasters to Advance Climate Change Adaptation*, Cambridge  
180 University Press (2012).
- 181 3. Lesk, C., Rowhani, P. & Ramankutty, N. Influence of extreme weather disasters on  
182 global crop production. *Nature* **529**, 84–87 (2016).
- 183 4. Lloyds, Food System Shock: The insurance impacts of acute disruption to global  
184 food supply. Emerging Risk Report (2015)
- 185 5. Challinor, A., Elliott, J., Kent, C., Lewis, K. & Wuebbles, D. Climate and global  
186 crop production shocks. *Global Food Security Resilience Taskforce* (2015).
- 187 6. Inter-Agency Standing & Committee on Risk Early Warning and Preparedness.  
188 Index for Risk Management (<http://www.inform-index.org/>). (2017).
- 189 7. Iizumi, T. *et al.* Impacts of El Niño Southern Oscillation on the global yields of  
190 major crops. *Nat. Commun.* **5**, 1–7 (2014).
- 191 8. Lobell, D. B., Schlenker, W. & Costa-Robert, J. Climate trends and global crop

- 192 production since 1980. *Science*. **333**, 616–620 (2011).
- 193 9. Deryng, D., Conway, D., Ramankutty, N., Price, J. & Warren, R. Global crop yield  
194 response to extreme heat stress under multiple climate change futures. *Environ.*  
195 *Res. Lett. Environ. Res. Lett* **9**, 34011–13 (2014).
- 196 10. Monfreda, C., Ramankutty, N. & Foley, J. A. Farming the planet: 2. Geographic  
197 distribution of crop areas, yields, physiological types, and net primary production  
198 in the year 2000. *Global Biogeochem. Cycles* **22**, 1–19 (2008).
- 199 11. Haddad, L. & Hawkes, C. A new global research agenda for food *Nature*. **540**, 30–  
200 32 (2016)
- 201 12. Garnett, T. Plating up solutions. *Science*. **353**, 1202–1204 (2016).
- 202 13. The Centre for Research on the Epidemiology of Disasters, The international  
203 disaster database (<http://emdat.be/>) (2016)
- 204 14. Food and Agriculture Organization of the United Nations, FAOSTAT  
205 (<http://faostat3.fao.org/>) (2016).
- 206 15. Rotz, S. & Fraser, E. D. G. Resilience and the industrial food system: analyzing  
207 the impacts of agricultural industrialization on food system vulnerability. *J.*  
208 *Environ. Stud. Sci.* **5**, 459–473 (2015).
- 209 16. Cardinale, B. J. *et al.* Biodiversity loss and its impact on humanity. *Nature* **489**,  
210 326–326 (2012).
- 211 17. R Core Development Team, R: A Language and Environment for Statistical  
212 Computing (2017).

213  
214  
215

## 216 **Acknowledgements**

217

218 This research was supported by an NSERC Discovery Grant, and a Genome  
219 Canada/Genome BC Grant to N. Ramankutty.

220  
221  
222  
223  
224  
225  
226  
227  
228  
229  
230  
231  
232  
233  
234  
235  
236

237

## 238 **Materials and Methods**

239 A full set of reproducible R<sup>17</sup> script and data are supplied as Supplementary Information  
240 to enable others to undertake the entirety of the analysis presented in this paper. Here we  
241 provide a brief description of the analysis.

242

### 243 **Data sets**

244 Three open source data sets were used in the analysis presented here. We obtained  
245 records of extreme weather disasters from the EM-DAT CRED International Disaster  
246 Database (<http://emdat.be/>), and crop production and gross production value data from  
247 the United Nations Food and Agricultural Organization's FAOSTAT database  
248 (<http://www.fao.org/faostat/en>). We processed the data to maintain continuity in  
249 geographic boundaries over time (e.g., aggregating data from 1992 onward to the Former  
250 Soviet Union). We matched the production data to the countries and year of recording  
251 present in the disaster database.

252

### 253 **Disaster impacts**

254 To identify the impact of heat and drought events on production for each of the six  
255 commodities for each country, we constructed a counterfactual production in disaster  
256 years and compared it to the observed production in those years. To do this we created  
257 two complementary 3D arrays,  $x_{i=1:131, j=1:53, k=l=1:18}$  and  $y_{i=1:131, j=1:53, k=l=1:18}$   
258 containing the national level production data for disaster and non-disaster years  
259 respectively, where  $i$  are countries,  $j$  are years (1961-2014),  $k$  are the commodities  
260 (cereals, oilcrops, pulses, roots and tubers, vegetables and fruits), and  $l$  are disasters (heat,  
261 drought, heat & drought). Counterfactual production in disaster years was estimated by  
262 linearly interpolating between  $y_j$ 's to create a new array  $\bar{y}_{i,j,k,l}$ . The loss or gain during  
263 heat and drought events for each country and commodity,  $L_{i,k}$ , was then estimated by  
264 summing the differences between the observed production and the counterfactual for all  
265 disaster types,  $L_{i,k} = \sum_{j,l} (\bar{y}_{i,j,k,l} - x_{i,j,k,l})$ . The cumulative impact during heat and  
266 drought events for each country for each commodity,  $I_{i,k}$  was then estimated as  $I_{i,k} = L_{i,k}$   
267  $/(P_{i,k} + L_{i,k})$ , where  $P_{i,k}$  is the sum of observed production for a given country and  
268 commodity over the study period,  $P_{i,k} = \frac{1}{n} \sum_{j,l} (y_{i,j,k,l} + x_{i,j,k,l})$ , where  $n$  is the length of  
269  $l$ . Thus,  $I_{i,k}$ , identifies the percent loss or gain in crop production for a given country and  
270 commodity, over the study period, against a counterfactual in which the disaster did not  
271 occur.

272

273

274

## 275 Null distributions

276 To identify if the production deviations in  $I_{i,k}$  were no different from what would be  
277 expected in years in which heat or drought disasters did not occur, we calculated the null  
278 distributions for each element of  $I_{i,k}$ , by running a 1000 simulated histories. We first set  
279 production values in real disasters years to null values. Then, for each of the 1000  
280 simulations, we randomly generated three fake disaster occurrences to occur in each  
281 country (the median number of heat and drought disasters occurring over the 1961-2014  
282 across countries was 4, and the range was 1-25). We used these fake disasters to create  
283 two more complementary 3D arrays,  $x_{F_{i=1:131,j=1:53,k=1:6}}$  and  $y_{F_{i=1:131,j=1:53,k=1:6}}$ ,  
284 containing the national level production data for fake disaster and non-disaster years  
285 respectively. Counterfactual production for fake disaster years was estimated by linearly  
286 interpolating between  $y_{F_j}$ 's to create a new array  $\overline{y}_{F_{i,j,k}}$ . The loss or gain during fake  
287 disasters for each country and commodity,  $LF_{i,k}$ , was then estimated by summing the  
288 differences between the observed production and the counterfactual,  
289  $LF_{i,k} = \sum_j (\overline{y}_{F_{i,j,k}} - x_{F_{i,j,k}})$ . The cumulative impact of fake disasters for each country  
290 for each commodity,  $IF_{i,k}$  was then estimated as  $IF_{i,k} = LF_{i,k} / (P_{i,k} + LF_{i,k})$ .  $I_{i,k}$  elements  
291 falling outside the bounds of the distribution of  $IF_{i,k}$  highlight the countries and  
292 commodities that show cumulative deviations in production during heat and drought  
293 years that are more extreme than deviations in years in which heat and drought events did  
294 not occur.

295

## 296 Monetary impacts

297 To estimate the total value of crop production for each commodity and country in our  
298 analysis,  $V_{i,k}$ , we retrieved the annual Gross Production Value (constant 2004-2006  
299 terms) for each of commodity and country, and summed these for the years 1961-2014.  
300 To estimate the cost of heat and drought events for each country and commodity,  $C_{i,k}$  we  
301 then multiplied the values of production, by the percent loss or gain in crop production  
302 for a given country and commodity against the counterfactual  $C_{i,k} = I_{i,k} \cdot V_{i,k}$ . Thus,  $C_{i,k}$   
303 indicates the dollar value of production that might have been obtained if heat and drought  
304 events did not occur for a given country and commodity, under the assumption of linear  
305 pricing with respect to supply. We summed over all commodities,  $k$ , to estimate the net  
306 impact of heat and drought events on a country basis.

307

308

309

310

311

312

313

314

315
